# Supplementary material
Source: Springer Nature journal article supplement (http://www.springermedizin.de/resource/supplementary/12888_2011_1852_MOESM3_ESM.pdf/9479738)

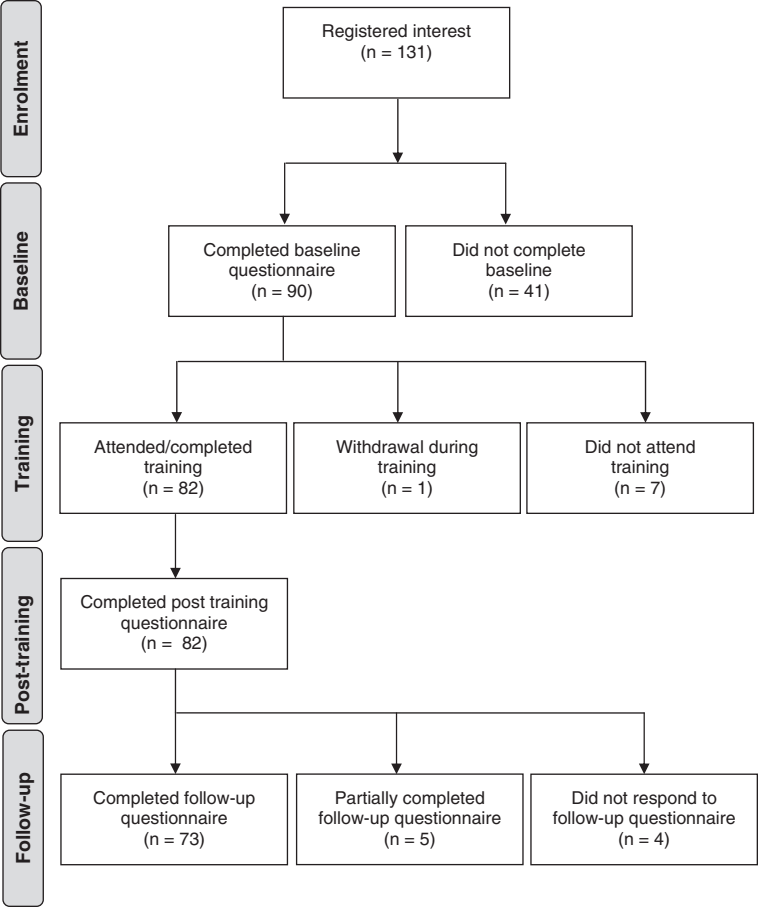

Supplement: MOESM3 [file 9479738]
